# Supplementary material
Source: PubMed Central journal article supplement (PMC9906355)
Supplement: mmc1-sup1-supinfo.pdf [file mmc1-sup1-supinfo.pdf]

***Supplemental Appendix for***

**Severe relapse of SARS-CoV-2 infection in a kidney transplant recipient with negative nasopharyngeal SARS-CoV-2 RT-PCR, after rituximab**

**Table of contents**

**SUPPLEMENTAL RESULTS ..... Page 2**  
**Supplemental material 1 ..... Page 2**  
**Supplemental table 1 ..... Page 3**

## **Supplemental material 1**

Molecular assays used during the relapse episode.

SARS-CoV-2 RT-PCR assays used on NP sample during the relapse episode were:

- Allplex™ SARS-CoV-2 Assay - Seegene Inc;
- Alinity m SARS-CoV-2 Assay – Abbott Molecular;
- Xpert Xpress SARS-CoV-2 – Cepheid

SARS-CoV-2 PCR assay used on the BAL from the relapse episode was Allplex™ SARS-CoV-2 Assay – (Seegene Inc). Cycle threshold (Ct) on the N gene was 20.

**Supplemental Table 1: GISAID accession numbers**

| clade           | pangolin_lineage | virus_name                                         | GISAID id_admission number |
|-----------------|------------------|----------------------------------------------------|----------------------------|
| 20A             | B.1.160          | hCoV-19/France/IDF-APHP-HEGP-06-01-2137006524/2021 | EPI_ISL_1500949            |
| 20E (EU1)       | B.1.177.52       | hCoV-19/France/IDF-APHP-HEGP-06-02-2131731577/2021 | EPI_ISL_1500950            |
| 20A             | B.1.160          | hCoV-19/France/IDF-APHP-HEGP-06-04-2137006240/2021 | EPI_ISL_1500952            |
| 20I (Alpha, V1) | B.1.1.7          | hCoV-19/France/IDF-APHP-HEGP-06-07-2131728879/2021 | EPI_ISL_1500954            |
| 20E (EU1)       | B.1.177.77       | hCoV-19/France/IDF-APHP-HEGP-06-10-2131729810/2021 | EPI_ISL_1500957            |
| 20A             | B.1.160          | hCoV-19/France/IDF-APHP-HEGP-06-12-2131724436/2021 | EPI_ISL_1500959            |
| 20D             | C.35             | hCoV-19/France/IDF-APHP-HEGP-06-14-2131715539/2021 | EPI_ISL_1500961            |
| 20A             | B.1.160          | hCoV-19/France/IDF-APHP-HEGP-06-16-2131712179/2021 | EPI_ISL_1500963            |
| 20A             | B.1              | hCoV-19/France/IDF-APHP-HEGP-06-17-2131704839/2021 | EPI_ISL_1500964            |
| 20E (EU1)       | B.1.177.52       | hCoV-19/France/IDF-APHP-HEGP-06-18-2031689058/2020 | EPI_ISL_1500965            |
| 20A             | B.1.258          | hCoV-19/France/IDF-APHP-HEGP-06-20-2131702900/2021 | EPI_ISL_1500967            |
| 20E (EU1)       | B.1.177.52       | hCoV-19/France/IDF-APHP-HEGP-06-22-2131699331/2021 | EPI_ISL_1500969            |
| 20A             | B.1.160          | hCoV-19/France/IDF-APHP-HEGP-06-24-2131698753/2021 | EPI_ISL_1500971            |
| 20E (EU1)       | B.1.177.43       | hCoV-19/France/IDF-APHP-HEGP-06-26-2131741967/2021 | EPI_ISL_1500972            |
| 20I (Alpha, V1) | B.1.1.7          | hCoV-19/France/IDF-APHP-HEGP-06-29-2131739047/2021 | EPI_ISL_1500975            |
| 20E (EU1)       | B.1.177.52       | hCoV-19/France/IDF-APHP-HEGP-06-33-2137007513/2021 | EPI_ISL_1500978            |
| 20A             | B.1.582          | hCoV-19/France/IDF-APHP-HEGP-06-35-2131736750/2021 | EPI_ISL_1500980            |
| 20A             | B.1.160          | hCoV-19/France/IDF-APHP-HEGP-06-36-2131735766/2021 | EPI_ISL_1500981            |
| 20A             | B.1.214.1        | hCoV-19/France/IDF-APHP-HEGP-06-39-2131734658/2021 | EPI_ISL_1500984            |
| 19B             | A.21             | hCoV-19/France/IDF-APHP-HEGP-06-40-2131732339/2021 | EPI_ISL_1500985            |
| 20A             | B.1.160          | hCoV-19/France/IDF-APHP-HEGP-06-41-2137006518/2021 | EPI_ISL_1500986            |
| 20A             | B.1.160          | hCoV-19/France/IDF-APHP-HEGP-06-43-2131734605/2021 | EPI_ISL_1500988            |
| 20A             | B.1.214.1        | hCoV-19/France/IDF-APHP-HEGP-06-45-2131732339/2021 | EPI_ISL_1500990            |

|                 |            |                                                    |                 |
|-----------------|------------|----------------------------------------------------|-----------------|
| 19B             | A.21       | hCoV-19/France/IDF-APHP-HEGP-06-46-2137006518/2021 | EPI_ISL_1500991 |
| 20A             | B.1.160    | hCoV-19/France/IDF-APHP-HEGP-06-47-2131731041/2021 | EPI_ISL_1500992 |
| 20A             | B.1.160    | hCoV-19/France/IDF-APHP-HEGP-06-48-2131731041/2021 | EPI_ISL_1500993 |
| 20A             | B.1        | hCoV-19/France/IDF-APHP-HEGP-07-03-2031689058/2020 | EPI_ISL_1500994 |
| 20A             | B.1.160    | hCoV-19/France/IDF-APHP-HEGP-07-05-2131698753/2021 | EPI_ISL_1500996 |
| 20I (Alpha, V1) | B.1.1.7    | hCoV-19/France/IDF-APHP-HEGP-07-08-2131705510/2021 | EPI_ISL_1500999 |
| 20E (EU1)       | B.1.177.81 | hCoV-19/France/IDF-APHP-HEGP-07-09-2131705523/2021 | EPI_ISL_1501000 |
| 20A             | B.1.160    | hCoV-19/France/IDF-APHP-HEGP-07-11-2131707223/2021 | EPI_ISL_1501002 |
| 20E (EU1)       | B.1.177.52 | hCoV-19/France/IDF-APHP-HEGP-07-14-2131742339/2021 | EPI_ISL_1501005 |
| 20A             | B.1.160    | hCoV-19/France/IDF-APHP-HEGP-07-15-2131743409/2021 | EPI_ISL_1501006 |
| 19B             | A.21       | hCoV-19/France/IDF-APHP-HEGP-07-16-2131743451/2021 | EPI_ISL_1501007 |
| 20I (Alpha, V1) | B.1.1.7    | hCoV-19/France/IDF-APHP-HEGP-07-25-2131746697/2021 | EPI_ISL_1501012 |
| 20E (EU1)       | B.1.177    | hCoV-19/France/IDF-APHP-HEGP-07-30-2131749133/2021 | EPI_ISL_1501016 |
| 20E (EU1)       | B.1.177.52 | hCoV-19/France/IDF-APHP-HEGP-07-36-2131750035/2021 | EPI_ISL_1501021 |
| 20I (Alpha, V1) | B.1.1.7    | hCoV-19/France/IDF-APHP-HEGP-09-02-2131773486/2021 | EPI_ISL_1501029 |
| 20I (Alpha, V1) | B.1.1.7    | hCoV-19/France/IDF-APHP-HEGP-09-05-2131775396/2021 | EPI_ISL_1501032 |
| 20E (EU1)       | W.1        | hCoV-19/France/IDF-APHP-HEGP-09-12-2131764644/2021 | EPI_ISL_1501036 |
| 20E (EU1)       | B.1.177    | hCoV-19/France/IDF-APHP-HEGP-09-15-2137012913/2021 | EPI_ISL_1501039 |
| 20H (Beta, V2)  | B.1.351    | hCoV-19/France/IDF-APHP-HEGP-09-17-2131768129/2021 | EPI_ISL_1501041 |
| 20H (Beta, V2)  | B.1.351    | hCoV-19/France/IDF-APHP-HEGP-09-24-2131753535/2021 | EPI_ISL_1501048 |
| 19B             | A.21       | hCoV-19/France/IDF-APHP-HEGP-10-04-2131779937/2021 | EPI_ISL_1501052 |
| 19B             | A.21       | hCoV-19/France/IDF-APHP-HEGP-10-05-2137015157/2021 | EPI_ISL_1501053 |
| 20E (EU1)       | B.1.177    | hCoV-19/France/IDF-APHP-HEGP-10-10-2131778855/2021 | EPI_ISL_1501057 |
| 20A             | B.1.111    | hCoV-19/France/IDF-APHP-HEGP-10-18-2131771138/2021 | EPI_ISL_1501065 |
| 20I (Alpha, V1) | B.1.1.7    | hCoV-19/France/IDF-APHP-HEGP-10-25-2131784071/2021 | EPI_ISL_1501071 |

|                 |            |                                                    |                 |
|-----------------|------------|----------------------------------------------------|-----------------|
| 20I (Alpha, V1) | B.1.1.7    | hCoV-19/France/IDF-APHP-HEGP-10-27-2131784528/2021 | EPI_ISL_1501073 |
| 20I (Alpha, V1) | B.1.1.7    | hCoV-19/France/IDF-APHP-HEGP-11-02-2131790084/2021 | EPI_ISL_1501101 |
| 20I (Alpha, V1) | B.1.1.7    | hCoV-19/France/IDF-APHP-HEGP-11-05-2131791217/2021 | EPI_ISL_1501104 |
| 21D (Eta)       | B.1.525    | hCoV-19/France/IDF-APHP-HEGP-11-23-2139001077/2021 | EPI_ISL_1501116 |
| 20H (Beta, V2)  | B.1.351    | hCoV-19/France/IDF-APHP-HEGP-11-24-2139001078/2021 | EPI_ISL_1501117 |
| 20H (Beta, V2)  | B.1.351    | hCoV-19/France/IDF-APHP-HEGP-11-25-2139001079/2021 | EPI_ISL_1501118 |
| 20I (Alpha, V1) | B.1.1.7    | hCoV-19/France/IDF-APHP-HEGP-11-32-2131800386/2021 | EPI_ISL_1501122 |
| 20H (Beta, V2)  | B.1.351.2  | hCoV-19/France/IDF-APHP-HEGP-11-44-2139001081/2021 | EPI_ISL_1501133 |
| 20H (Beta, V2)  | B.1.351.2  | hCoV-19/France/IDF-APHP-HEGP-11-46-2139001083/2021 | EPI_ISL_1501134 |
| 20J (Gamma, V3) | P.1        | hCoV-19/France/IDF-APHP-HEGP-11-49-2139001086/2021 | EPI_ISL_1501136 |
| 20H (Beta, V2)  | B.1.351.2  | hCoV-19/France/IDF-APHP-HEGP-11-50-2139001087/2021 | EPI_ISL_1501137 |
| 20D             | B.1.1.1    | hCoV-19/France/IDF-APHP-HEGP-12-04-2131803871/2021 | EPI_ISL_1501139 |
| 20D             | B.1.1.1    | hCoV-19/France/IDF-APHP-HEGP-12-10-2131805390/2021 | EPI_ISL_1501145 |
| 20E (EU1)       | B.1.177.78 | hCoV-19/France/IDF-APHP-HEGP-12-13-2137019513/2021 | EPI_ISL_1501148 |
| 20H (Beta, V2)  | B.1.351    | hCoV-19/France/IDF-APHP-HEGP-12-21-2131807749/2021 | EPI_ISL_1501153 |
| 20I (Alpha, V1) | B.1.1.7    | hCoV-19/France/IDF-APHP-HEGP-12-29-2131811525/2021 | EPI_ISL_1501161 |
| 20I (Alpha, V1) | B.1.1.7    | hCoV-19/France/IDF-APHP-HEGP-12-39-2139001205/2021 | EPI_ISL_1501170 |
| 20D             | C.36.3     | hCoV-19/France/IDF-APHP-HEGP-12-40-2139001206/2021 | EPI_ISL_1501171 |
| 20H (Beta, V2)  | B.1.351    | hCoV-19/France/IDF-APHP-HEGP-12-46-2139001212/2021 | EPI_ISL_1501173 |
| 20H (Beta, V2)  | B.1.351.2  | hCoV-19/France/IDF-APHP-HEGP-13-01-2131816453/2021 | EPI_ISL_1501174 |
| 20I (Alpha, V1) | B.1.1.7    | hCoV-19/France/IDF-APHP-HEGP-13-02-2131816851/2021 | EPI_ISL_1501175 |
| 20I (Alpha, V1) | B.1.1.7    | hCoV-19/France/IDF-APHP-HEGP-13-04-2131815286/2021 | EPI_ISL_1501177 |
| 20I (Alpha, V1) | B.1.1.7    | hCoV-19/France/IDF-APHP-HEGP-13-20-2131819177/2021 | EPI_ISL_1501189 |
| 20I (Alpha, V1) | B.1.1.7    | hCoV-19/France/IDF-APHP-HEGP-13-21-2131819341/2021 | EPI_ISL_1501190 |
| 20H (Beta, V2)  | B.1.351    | hCoV-19/France/IDF-APHP-HEGP-13-30-2131823298/2021 | EPI_ISL_1501199 |

|                 |            |                                                    |                 |
|-----------------|------------|----------------------------------------------------|-----------------|
| 20B             | B.1.1.420  | hCoV-19/France/IDF-APHP-HEGP-13-43-2131827758/2021 | EPI_ISL_1501210 |
| 20H (Beta, V2)  | B.1.351    | hCoV-19/France/IDF-APHP-HEGP-13-45-2139001414/2021 | EPI_ISL_1501211 |
| 21D (Eta)       | B.1.525    | hCoV-19/France/IDF-APHP-HEGP-13-51-2139001419/2021 | EPI_ISL_1501213 |
| 21D (Eta)       | B.1.525    | hCoV-19/France/IDF-APHP-HEGP-13-53-2139001421/2021 | EPI_ISL_1501214 |
| 21D (Eta)       | B.1.525    | hCoV-19/France/IDF-APHP-HEGP-13-54-2139001422/2021 | EPI_ISL_1501215 |
| 21D (Eta)       | B.1.525    | hCoV-19/France/IDF-APHP-HEGP-13-57-2139001425/2021 | EPI_ISL_1501217 |
| 20I (Alpha, V1) | B.1.1.7    | hCoV-19/France/IDF-APHP-HEGP-14-03-2131831205/2021 | EPI_ISL_1501218 |
| 20I (Alpha, V1) | B.1.1.7    | hCoV-19/France/IDF-APHP-HEGP-14-05-2131830527/2021 | EPI_ISL_1501219 |
| 20H (Beta, V2)  | B.1.351    | hCoV-19/France/IDF-APHP-HEGP-14-06-2131832050/2021 | EPI_ISL_1501220 |
| 20A             | B.1.160    | hCoV-19/France/IDF-APHP-HEGP-14-12-2137024767/2021 | EPI_ISL_1501226 |
| 20A             | B.1.160    | hCoV-19/France/IDF-APHP-HEGP-14-13-2137024726/2021 | EPI_ISL_1501227 |
| 20H (Beta, V2)  | B.1.351    | hCoV-19/France/IDF-APHP-HEGP-14-18-2131833383/2021 | EPI_ISL_1501231 |
| 21D (Eta)       | B.1.525    | hCoV-19/France/IDF-APHP-HEGP-14-22-2131834791/2021 | EPI_ISL_1501235 |
| 20E (EU1)       | B.1.177.81 | hCoV-19/France/IDF-APHP-HEGP-14-24-2131836105/2021 | EPI_ISL_1501237 |
| 20I (Alpha, V1) | B.1.1.7    | hCoV-19/France/IDF-APHP-HEGP-14-30-2131837068/2021 | EPI_ISL_1501242 |
| 20I (Alpha, V1) | B.1.1.7    | hCoV-19/France/IDF-APHP-HEGP-14-32-2131837508/2021 | EPI_ISL_1501244 |
| 20A             | B.1.160    | hCoV-19/France/IDF-APHP-HEGP-14-42-2137025814/2021 | EPI_ISL_1501251 |
| 21D (Eta)       | B.1.525    | hCoV-19/France/IDF-APHP-HEGP-14-53-2139001562/2021 | EPI_ISL_1501258 |
| 20H (Beta, V2)  | B.1.351    | hCoV-19/France/IDF-APHP-HEGP-14-62-2139001574/2021 | EPI_ISL_1501264 |
| 20J (Gamma, V3) | P.1        | hCoV-19/France/IDF-APHP-HEGP-14-63-2139001575/2021 | EPI_ISL_1501265 |
| 21D (Eta)       | B.1.525    | hCoV-19/France/IDF-APHP-HEGP-14-65-2139001578/2021 | EPI_ISL_1501266 |
